# Supplementary material for: Determining Threshold Values for a Crop Water Stress Index-Based Center Pivot Irrigation with Optimum Grain Yield
Source: MDPI journal article supplement (doi:10.3390/agriculture11100958), 2021-10-02
Supplement: s1 [file s1]

### Supplementary materials:

**Table S1.** Goodness of fit between soil water content (SWC, % *v/v*) measured using Insentek sensors and oven–dry method across different soil textures in the laboratory at the Xuchang Irrigation Experiment Station in 2017–2018.

| Soil texture | SWC measured by Insentek sensor |         |      | Goodness of fit |      | Correlation    | Significance |
|--------------|---------------------------------|---------|------|-----------------|------|----------------|--------------|
|              | Maximum                         | Minimum | Mean | RMSE            | RPD  | R <sup>2</sup> | <i>p</i>     |
| Sand         | 3.46                            | 28.6    | 18.1 | 1.044           | 6.78 | 0.997          | 0.0001       |
| Silt loam    | 7.26                            | 35.1    | 22.7 | 0.927           | 7.99 | 0.995          | 0.0001       |
| Clay         | 17.7                            | 33.7    | 25.4 | 0.897           | 5.61 | 0.997          | 0.0001       |

Note: RMSE is root mean square error; RPD is relative prediction deviation. SWC values measured by Insentek sensor are reliable with  $RPD \geq 4.0$ ; R<sup>2</sup> is coefficient of determination; *p* is probability.

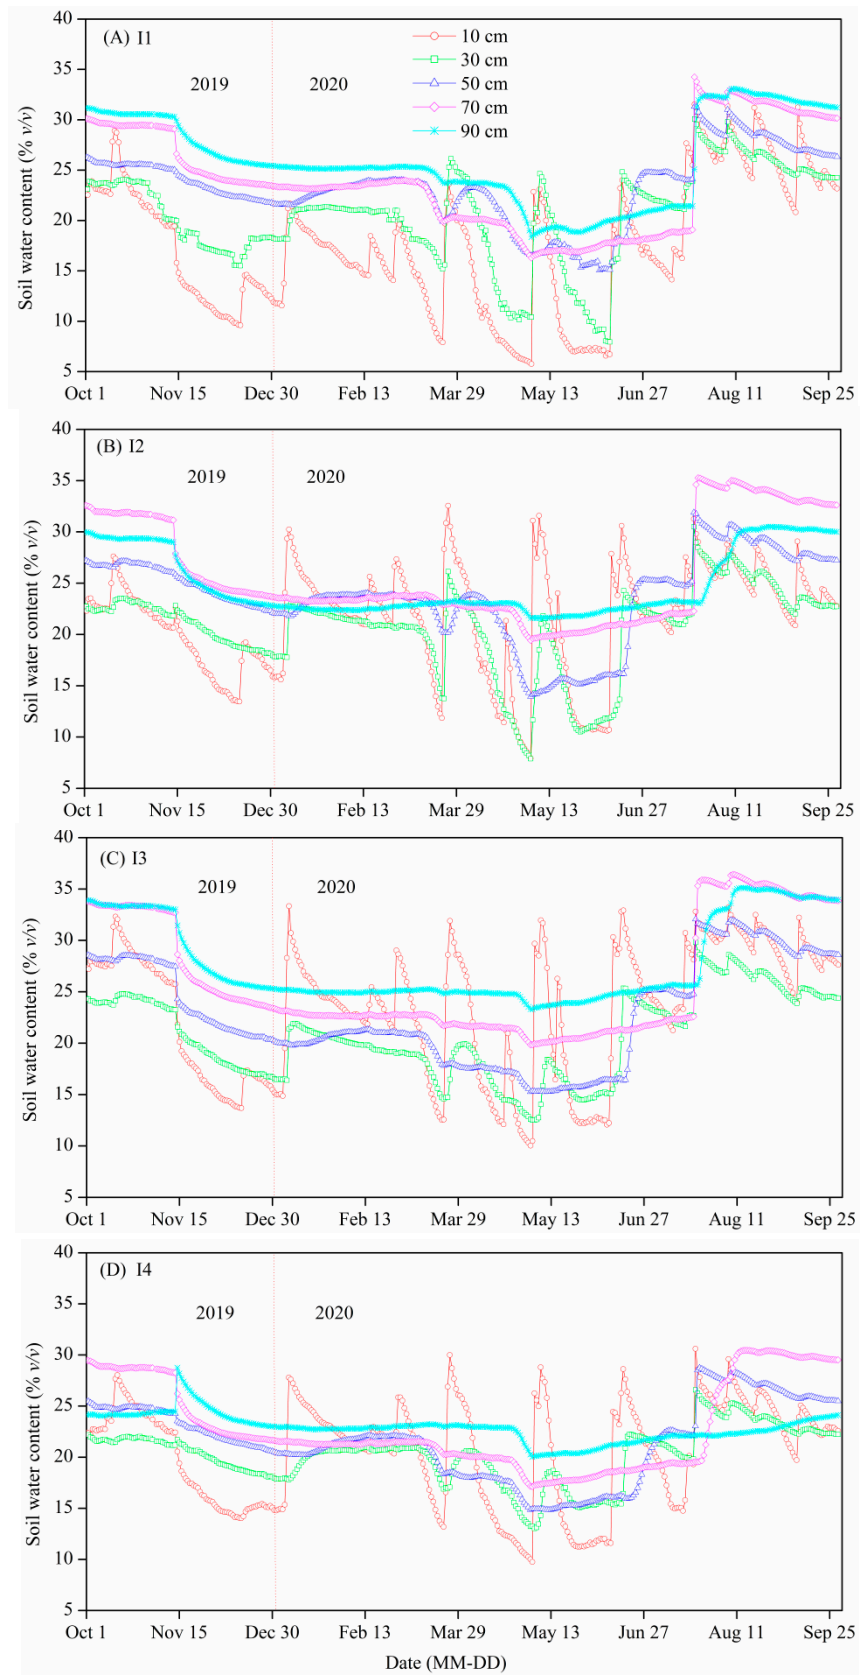

**Figure S1.** Seasonal variations in soil water content (SWC, %  $v/v$ ) under (A) I1, (B) I2, (C) I3, and (D) I4 treatments in a winter wheat–summer maize cropping system during the 2019-2020 growing season.
